# Supplementary material for: Metal ion–humic acid nanoparticle interactions: role of both complexation and condensation mechanisms
Source: Royal Society of Chemistry journal article supplement (doi:10.1039/c6cp02634f), 2016-01-01
Supplement: c6cp02634f1.pdf [file c6cp02634f1.pdf]

## Supplementary Information

### **Metal ion - humic acid nanoparticle interactions: role of both complexation and condensation mechanisms**

Raewyn M. Town<sup>\*a</sup> and Herman P. van Leeuwen<sup>b</sup>

<sup>a</sup> Department of Physics, Chemistry and Pharmacy, University of Southern Denmark, Campusvej 55, 5230 Odense, Denmark. Email: [raewyn.town@sdu.dk](mailto:raewyn.town@sdu.dk)

<sup>b</sup> Physical Chemistry and Soft Matter, Wageningen University & Research, Stippeneng 4, 6708 WE Wageningen, The Netherlands.

**Table S1. Parameters defining the bulk and intraparticulate metal speciation in highly charged, soft nanoparticulate complexants<sup>(a)</sup>**

| M(II) species                  | Bulk aqueous medium                         | Intraparticulate double layer                 | Donnan volume                           | Governing physicochemical features |
|--------------------------------|---------------------------------------------|-----------------------------------------------|-----------------------------------------|------------------------------------|
| Free M                         | $c_{M,f}^*$                                 | $c_{M,f}^{DL} = \bar{f}_{B,M}^{DL} c_{M,f}^*$ | $c_{M,f}^D = \bar{f}_{B,M}^D c_{M,f}^*$ | Donnan                             |
| Condensed M                    |                                             | $c_{M,cond}^{DL} = \bar{f}_C c_S^{DL}$        | $0^{(b)}$                               | Counterion condensation            |
| Inner-sphere MS <sup>(c)</sup> |                                             | $c_{MS} = \bar{K}_{int} c_S c_{M,f}$          |                                         | Covalent binding                   |
| Total particle-associated M    | $c_{MHA}^* = \bar{K}_{app} c_S^* c_{M,f}^*$ |                                               |                                         |                                    |

<sup>(a)</sup> The concentrations are denoted by: superscript \* for smeared-out bulk solution concentration; superscript D or DL for local intraparticulate concentrations in the pertaining part of the particle volume; no superscript for the average intraparticulate concentration. The condensation limit for 2+ counterions in the DL with  $\rho = \bar{\rho}_{DL}$  is denoted by  $\bar{f}_C$ . See main text for definitions of all symbols.

<sup>(b)</sup> in the high charge density regime, with  $\kappa_p r_p \gg 1$ , counterion condensation is confined to the intraparticulate double layer shell.

<sup>(c)</sup> see eqn (8) in main text.
